# Supplementary material for: Non-Toxic Dimeric Peptides Derived from the Bothropstoxin-I Are Potent SARS-CoV-2 and Papain-like Protease Inhibitors
Source: MDPI journal article supplement (doi:10.3390/molecules26164896), 2021-08-12
Supplement: s1 [file s1]

## **Non-toxic dimeric peptides derived from the Bothropstoxin-I are potent SARS-CoV-2 and Papain-Like Protease inhibitors**

*Marjorie C. L. C. Freire,<sup>1</sup> Gabriela D. Noske,<sup>1</sup> Natália V. Bitencourt,<sup>2</sup> Paulo R. S. Sanches,<sup>2</sup> Norival A. Santos-Filho,<sup>2</sup> Victor O. Gawriljuk,<sup>1</sup> Eduardo P. de Souza,<sup>3</sup> Victor H. R. Nogueira,<sup>1</sup> Mariana O. de Godoy,<sup>1</sup> Aline M. Nakamura,<sup>1</sup> Rafaela S. Fernandes,<sup>1</sup> Andre S. Godoy,<sup>1</sup> Maria A. Juliano,<sup>4</sup> Bianca M. Peres,<sup>5</sup> Cecília Gomes Barbosa,<sup>5</sup> Carolina B. Moraes,<sup>6</sup> Lucio H. Freitas-Junior,<sup>5</sup> Eduardo M. Cilli,<sup>2</sup> Rafael V. C. Guido,<sup>1\*</sup> Glaucius Oliva<sup>1\*</sup>*

<sup>1</sup> São Carlos Institute of Physics, University of Sao Paulo, Avenida João Dagnone, 1100, São Carlos, SP 13563-120, São Carlos, Brazil.

<sup>2</sup> Department of Biochemistry and Organic Chemistry, Institute of Chemistry, São Paulo State University, SP, Brazil.

<sup>3</sup> Department of Genetics and Evolution, Federal University of São Carlos, São Carlos, 13565-905 – São Paulo – Brazil

<sup>4</sup> The Sao Paulo School of Medicine, Federal University of São Paulo

<sup>5</sup> Department of Microbiology, Institute of Biomedical Sciences, University of Sao Paulo, Av. Prof. Lineu Prestes, 1374, Sao Paulo-SP 05508-900, Brazil.

<sup>6</sup> Department of Pharmaceutical Sciences, Federal University of São Paulo, Rua São Nicolau, 210, Diadema – SP, 09913-030, Brazil.

(\*) Joint corresponding authors

Rafael V. C. Guido

Physics Institute of São Carlos, University of São Paulo

Av. Joao Dagnone, 1.100, Jd. Santa Angelina, 13563-120, Sao Carlos-SP, Brazil

Phone: +55 16 3373-8673

e-mail: [rvcguido@usp.br](mailto:rvcguido@usp.br)

ORCID: <http://orcid.org/0000-0002-7187-0818>

Glaucius Oliva

Physics Institute of São Carlos, University of São Paulo

Av. Joao Dagnone, 1.100, Jd. Santa Angelina, 13563-120, Sao Carlos-SP, Brazil

Phone: +55 16 3373-6664

e-mail: [oliva@ifsc.usp.br](mailto:oliva@ifsc.usp.br)

ORCID: <https://orcid.org/0000-0003-2719-0302>

## TABLE OF CONTENTS

|                                                                                                                                                                                                                                                                                                                                                                                                                                                                                                                                                                                                                     |       |
|---------------------------------------------------------------------------------------------------------------------------------------------------------------------------------------------------------------------------------------------------------------------------------------------------------------------------------------------------------------------------------------------------------------------------------------------------------------------------------------------------------------------------------------------------------------------------------------------------------------------|-------|
| <b>Figure S1.</b> RT-qPCR quantification of antiviral activity of reference drugs against SARS-CoV-2. Viral genome-equivalents in culture supernatants after 48 h of infection in the presence of vehicle (0.5% DMSO, light purple), 50 $\mu$ M and 0.78 $\mu$ M chloroquine (salmon) and 5 $\mu$ M and 80 nM brequinar (green). The mean and standard error of the mean values from three independent experiments are shown.....                                                                                                                                                                                   | S2    |
| <b>Figure S2.</b> <i>In vitro</i> antiviral activity of peptides against SARS-CoV-2-infected Vero cells in the phenotypic screening assay. Representative images of infected cells treated with vehicle (0.5% DMSO, top left), 12.5 $\mu$ M chloroquine (CQ, middle left), 100 $\mu$ M (pBthTX-I) <sub>2</sub> K (middle right), 100 $\mu$ M A8 (bottom left) and 25 $\mu$ M A12 (bottom right). SARS-CoV-2 infection is shown in green, as detected by indirect immunofluorescence assay (IFA) using an anti-S protein serum. Vero cell nuclei are shown in blue. Non-infected cells are shown as IFA control..... | S3    |
| <b>Figure S3:</b> Single concentration inhibition screening of peptide analogs (10 $\mu$ M) against M <sup>pro</sup> and PL <sup>pro</sup> from SARS-COV-2. ....                                                                                                                                                                                                                                                                                                                                                                                                                                                    | S4    |
| <b>Figure S4:</b> $K_d$ values determination by microscale thermophoresis (MST). <b>(B)</b> Plot of the correlation between the assessed IC <sub>50</sub> and $K_d$ values of peptide analogs (pBthTX-I) <sub>2</sub> K, A1, A2, A4, A3, A5, A6, A11, and A12 ( $r^2 = 0.7$ ).....                                                                                                                                                                                                                                                                                                                                  | S5    |
| <b>Figure S5:</b> Predicted top 2 <b>(A)</b> , top 3 <b>(B)</b> , top 4 <b>(C)</b> , and top 5 <b>(D)</b> binding modes of (pBthTX-I) <sub>2</sub> K to PL <sup>pro</sup> . The binding energies and r.m.s.d. values (with respect to the top-ranked pose) for each pose are indicated.....                                                                                                                                                                                                                                                                                                                         | S6    |
| <b>Figure S6.</b> Peptides' integrity assessment. Analytical HPLC was performed using a binary HPLC system from Shimadzu with a SPD-10AV Shimadzu UV-Vis detector, coupled to an Ultrasphere C-18 column (5 $\mu$ , 4.6 x 250 mm) which was eluted with solvent systems A1 (TFA/H <sub>2</sub> O, 1:1000) and B1 (ACN/ H <sub>2</sub> O/TFA, 900:100:1) at a flow rate of 1.0 mL/min and a 5-80% gradient of B1 over 10 min. The HPLC column eluates were monitored by their absorbance at 220 nm The molecular weight was checked by mass spectrometry 2020 (Shimadzu).....                                        | S7–S8 |
| <b>Figure S7:</b> SARS-CoV-2 PL <sup>pro</sup> purification. <b>A)</b> Chromatogram of Size Exclusion Chromatography step; <b>B)</b> SDS-PAGE gel of PL <sup>pro</sup> : M – molecular weight marker; GF – fraction eluted at Size Exclusion Chromatography step.....                                                                                                                                                                                                                                                                                                                                               | S9    |
| <b>Figure S8.</b> Representative time-dependent traces of the substrate fluorescence at different inhibitor concentrations.....                                                                                                                                                                                                                                                                                                                                                                                                                                                                                     | S10   |
| <b>Figure S9.</b> IC <sub>50</sub> plots of representative peptides collected in November/2020 and June/2021.....                                                                                                                                                                                                                                                                                                                                                                                                                                                                                                   | S11   |
| <b>Table S1:</b> Inhibitory activity of (pBthTX-I) <sub>2</sub> K and analogs against SARS-CoV-2 and PL <sup>pro</sup> at 100 $\mu$ M and 10 $\mu$ M, respectively. The substituted Ala residue on the sequence of each peptide is indicated as red.....                                                                                                                                                                                                                                                                                                                                                            | S12   |

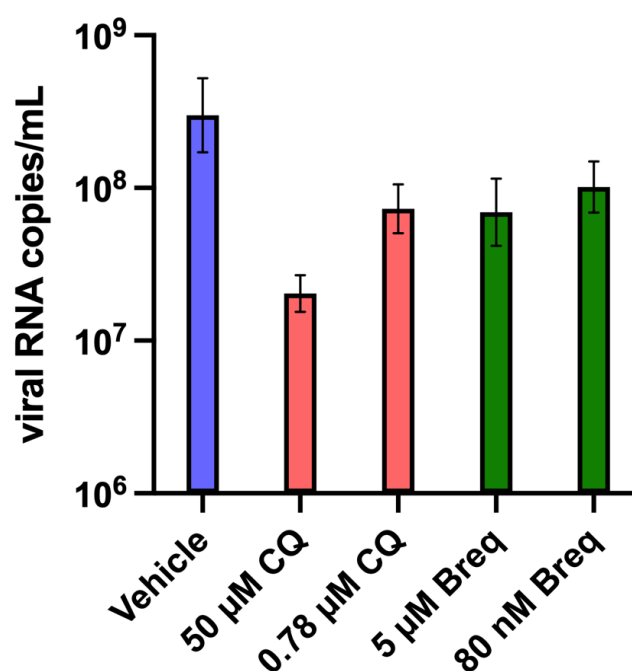

**Figure S1.** RT-qPCR quantification of antiviral activity of reference drugs against SARS-CoV-2. Viral genome-equivalents in culture supernatants after 48 h of infection in the presence of vehicle (0.5% DMSO, light purple), 50  $\mu$ M and 0.78  $\mu$ M chloroquine (salmon) and 5  $\mu$ M and 80 nM brequinar (green). The mean and standard error of the mean values from three independent experiments are shown.

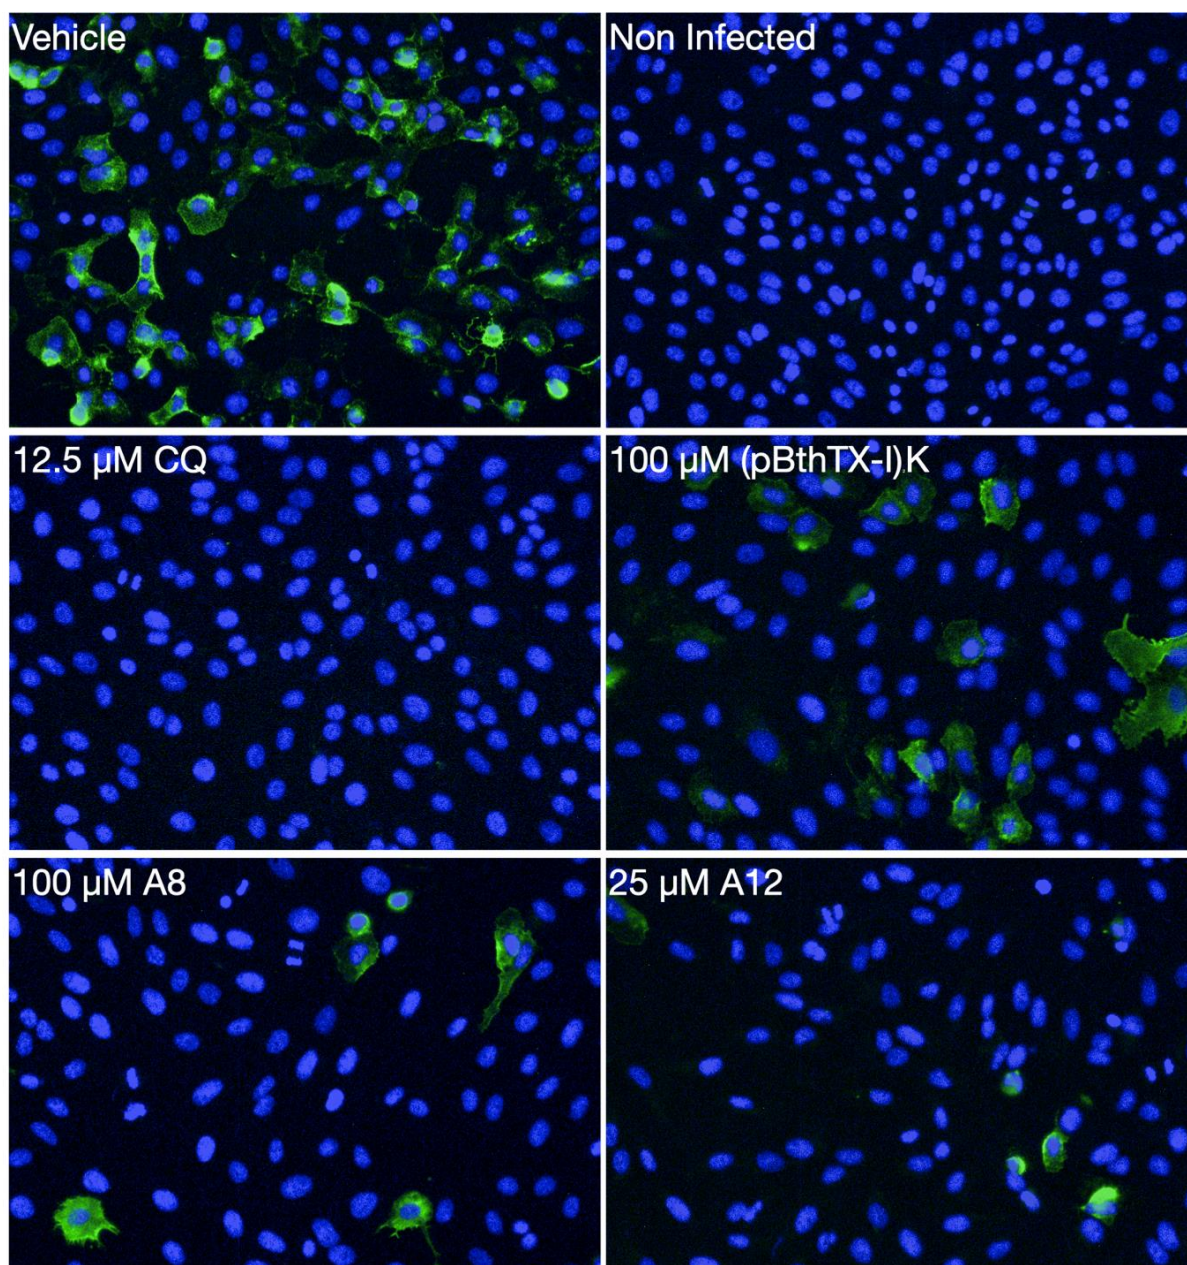

**Figure S2.** *In vitro* antiviral activity of peptides against SARS-CoV-2-infected Vero cells in the phenotypic screening assay. Representative images of infected cells treated with vehicle (0.5% DMSO, top left), 12.5  $\mu$ M chloroquine (CQ, middle left), 100  $\mu$ M (pBthTX-I)<sub>2</sub>K (middle right), 100  $\mu$ M A8 (bottom left) and 25  $\mu$ M A12 (bottom right). SARS-CoV-2 infection is shown in green, as detected by indirect immunofluorescence assay (IFA) using an anti-S protein serum. Vero cell nuclei are shown in blue. Non-infected cells are shown as IFA control.

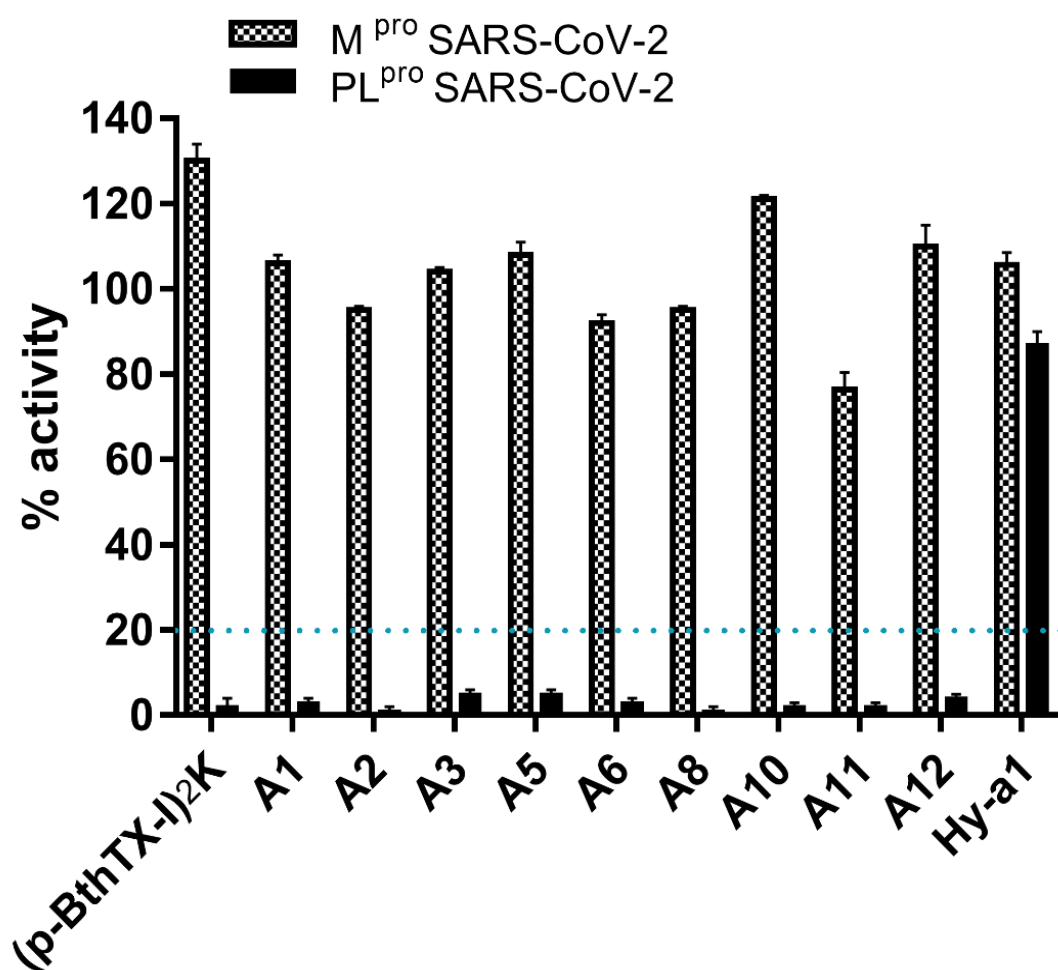

**Figure S3:** Single concentration inhibition screening of peptide analogs (10  $\mu$ M) against M<sup>pro</sup> and PL<sup>pro</sup> from SARS-COV-2.



**A**

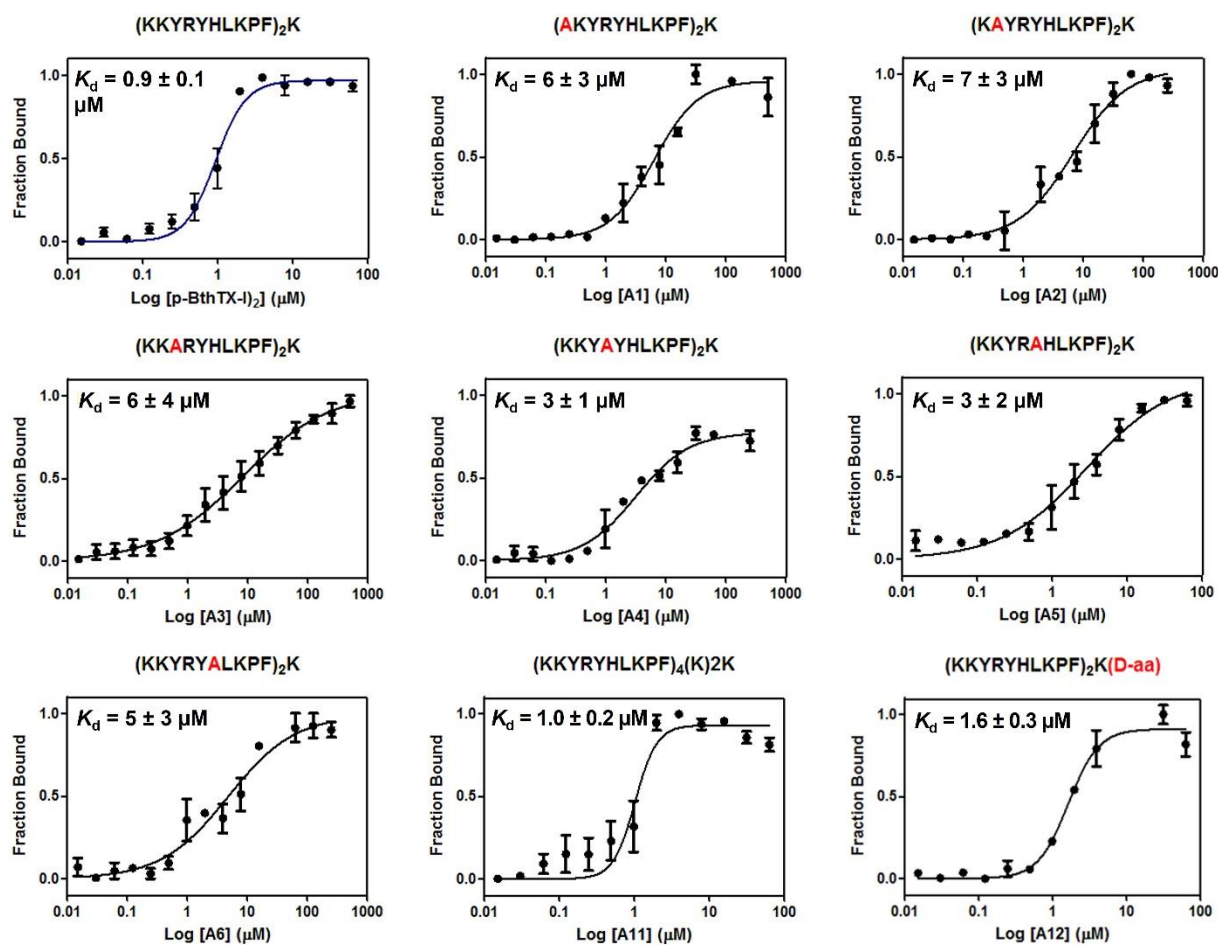

**B**

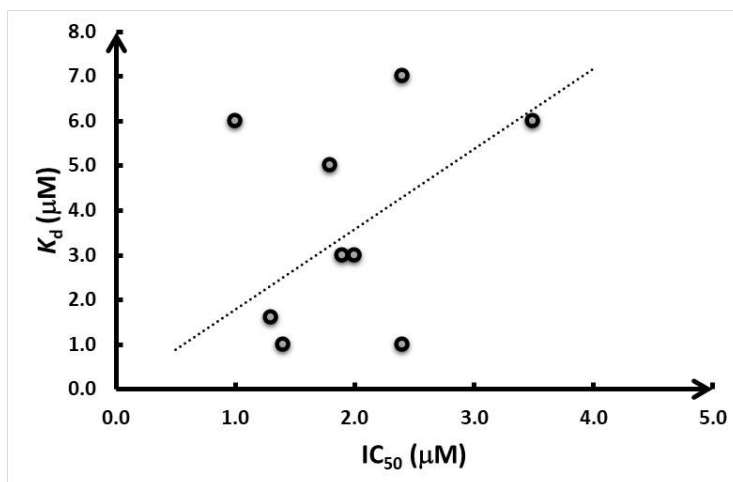

**Figure S4:** (A)  $K_d$  values determination by microscale thermophoresis (MST). (B) Plot of the correlation between the assessed  $\text{IC}_{50}$  and  $K_d$  values of peptide analogs (pBthTX-I)<sub>2</sub>K, A1, A2, A4, A3, A5, A6, A11, and A12 ( $r^2 = 0.7$ ).

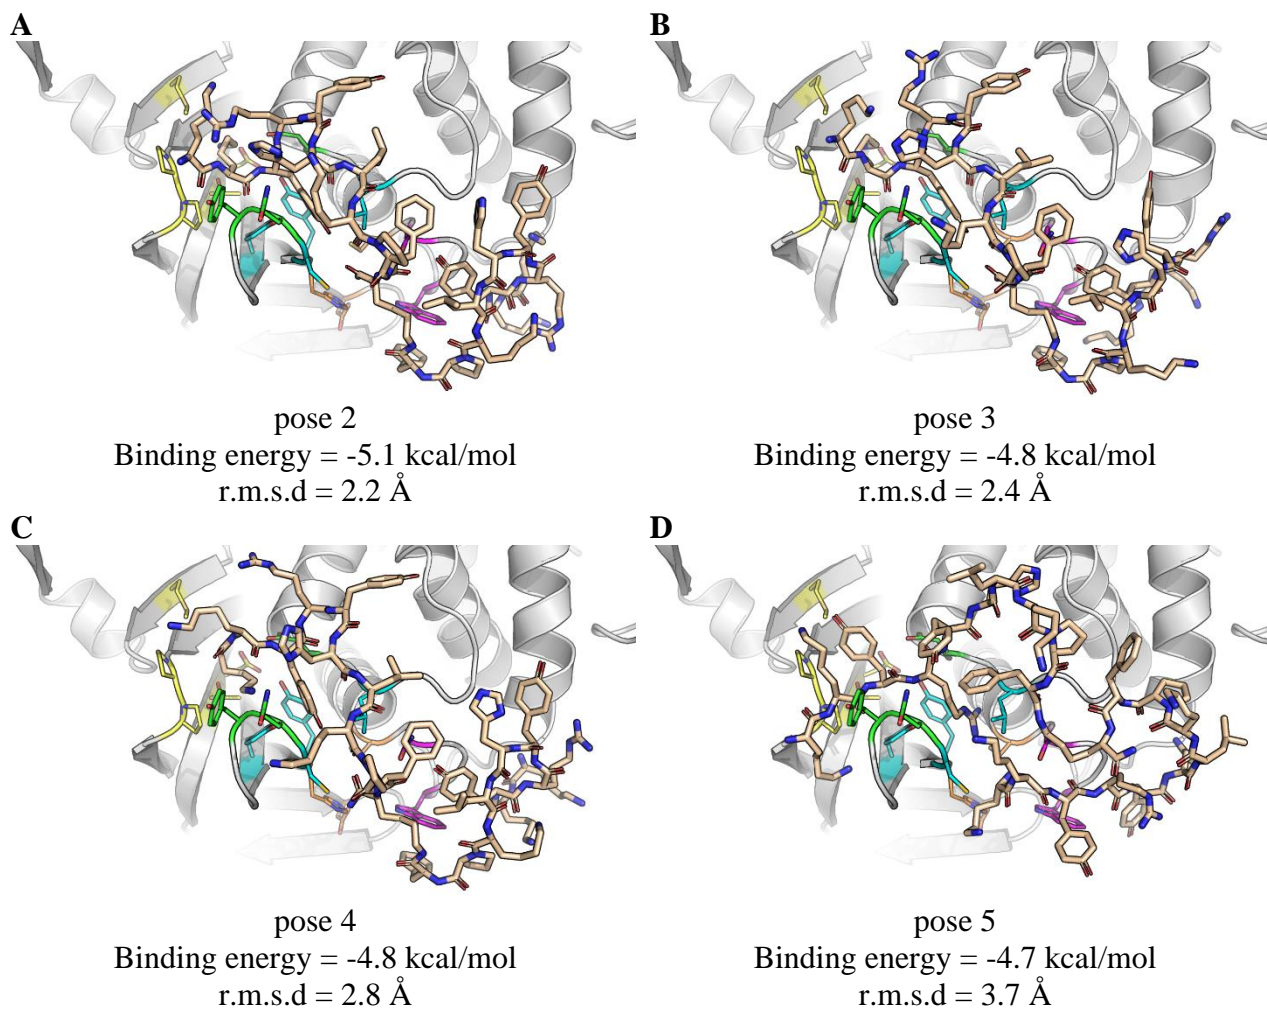

**Figure S5:** Predicted top 2 (**A**), top 3 (**B**), top 4 (**C**), and top 5 (**D**) binding modes of (pBthTX-I)<sub>2</sub>K to PL<sup>pro</sup>. The binding energies and r.m.s.d. values (with respect to the top-ranked pose) for each pose are indicated.

(pBthTX-I)2K

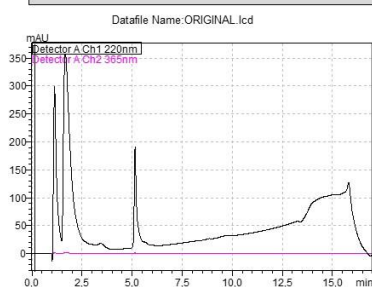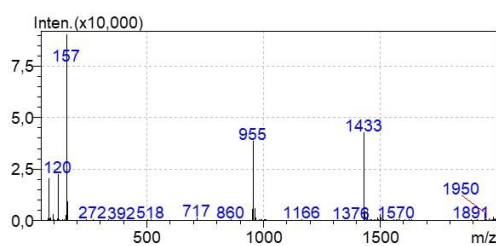

$M+1H^+ = 2866$   
 $M+2H^+ = 1433$   
 $M+3H^+ = 955$

A2

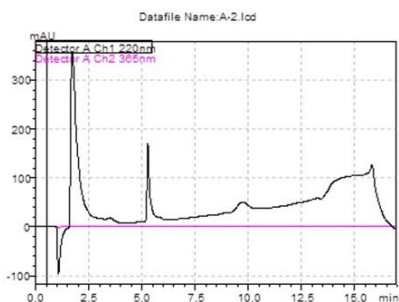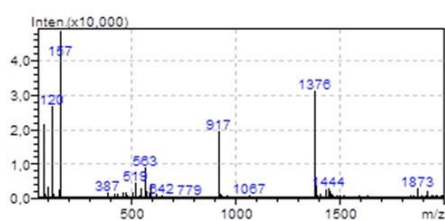

$M+1H^+ = 2752$   
 $M+2H^+ = 1376$   
 $M+3H^+ = 917$

A3

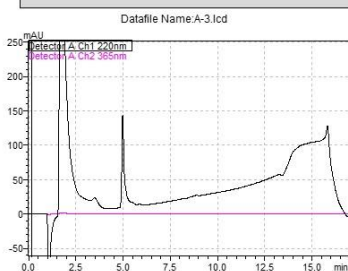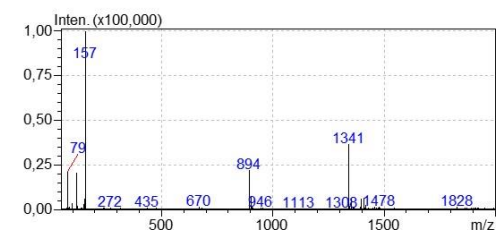

$M+1H^+ = 2682$   
 $M+2H^+ = 1341$   
 $M+3H^+ = 894$

A4

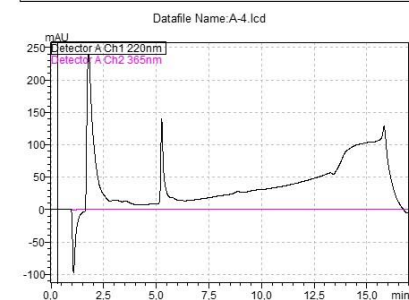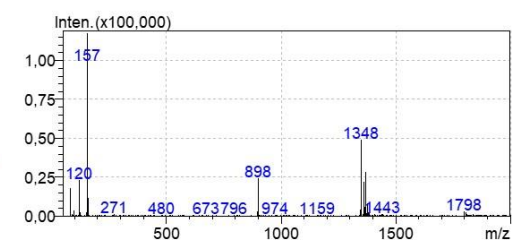

$M+1H^+ = 2696$   
 $M+2H^+ = 1348$   
 $M+3H^+ = 898$

A5

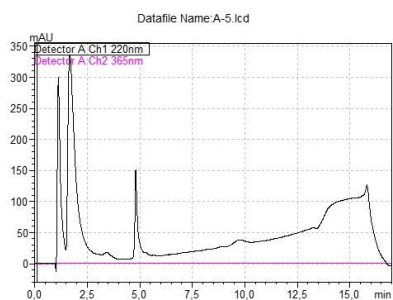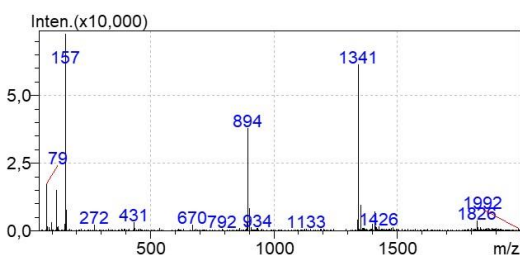

$M+1H^+ = 2682$   
 $M+2H^+ = 1341$   
 $M+3H^+ = 894$



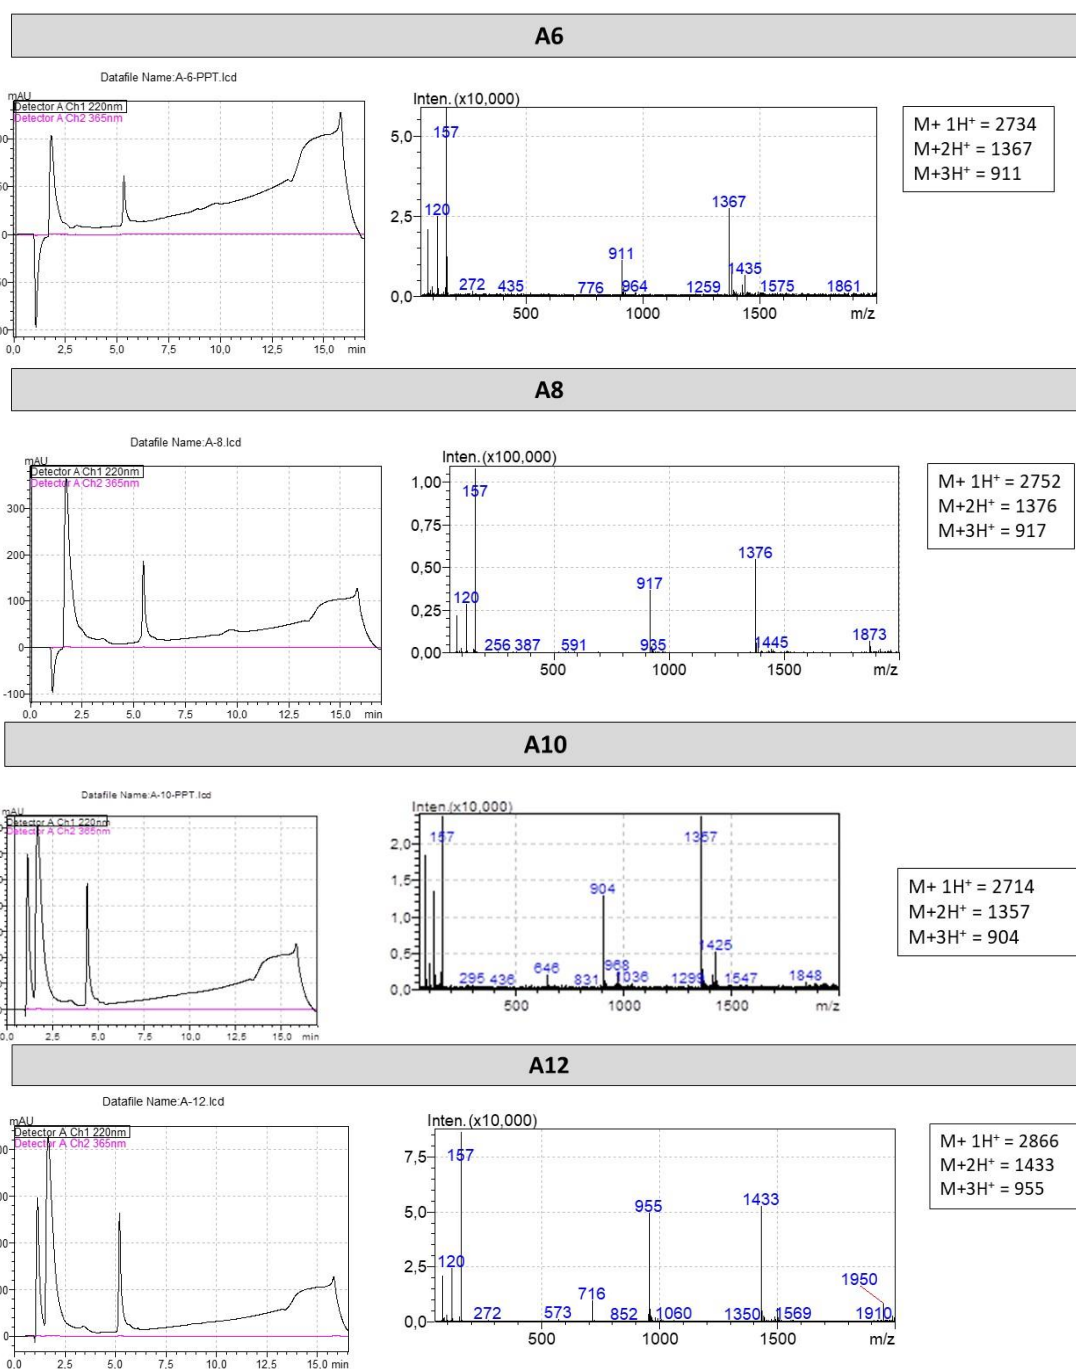

**Figure S6.** Peptides integrity assessment. Analytical HPLC was performed using a binary HPLC system from Shimadzu with a SPD-10AV Shimadzu UV-Vis detector, coupled to an Ultrasphere C-18 column (5  $\mu$ , 4.6 x 250 mm) which was eluted with solvent systems A1 (TFA/H<sub>2</sub>O, 1:1000) and B1 (ACN/ H<sub>2</sub>O/TFA, 900:100:1) at a flow rate of 1.0 mL/min and a 5-80% gradient of B1 over 10 min. The HPLC column eluates were monitored by their absorbance at 220 nm. The molecular weight was checked by mass spectrometry 2020 (Shimadzu).

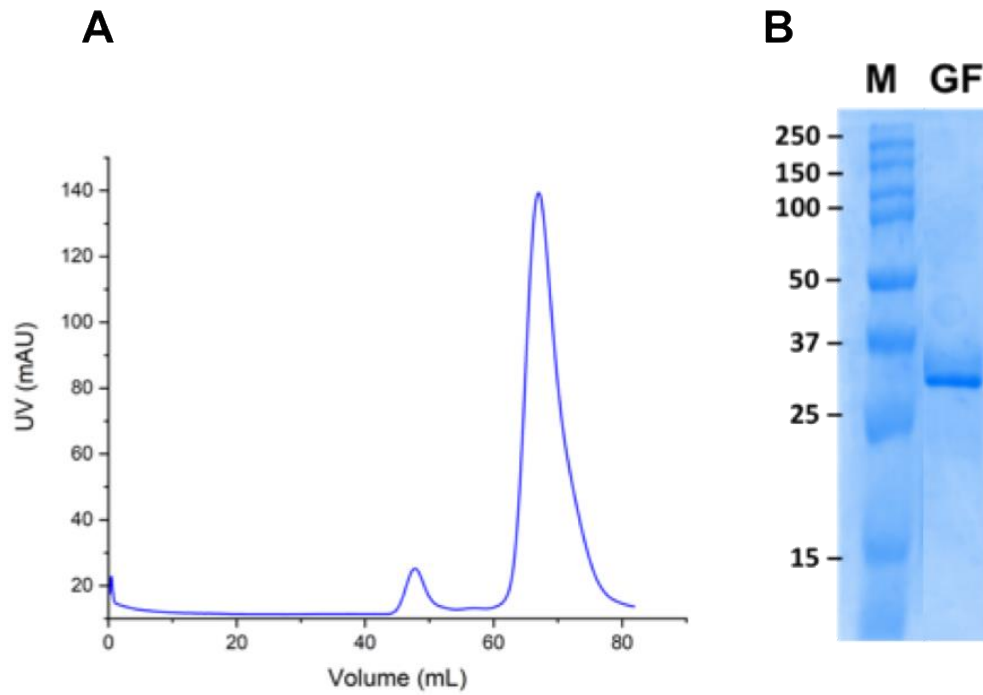

**Figure S7:** SARS-CoV-2 PL<sup>pro</sup> purification. **A)** Chromatogram of Size Exclusion Chromatography step; **B)** SDS-PAGE gel of PL<sup>pro</sup>: M – molecular weight marker; GF – fraction eluted at Size Exclusion Chromatography step.

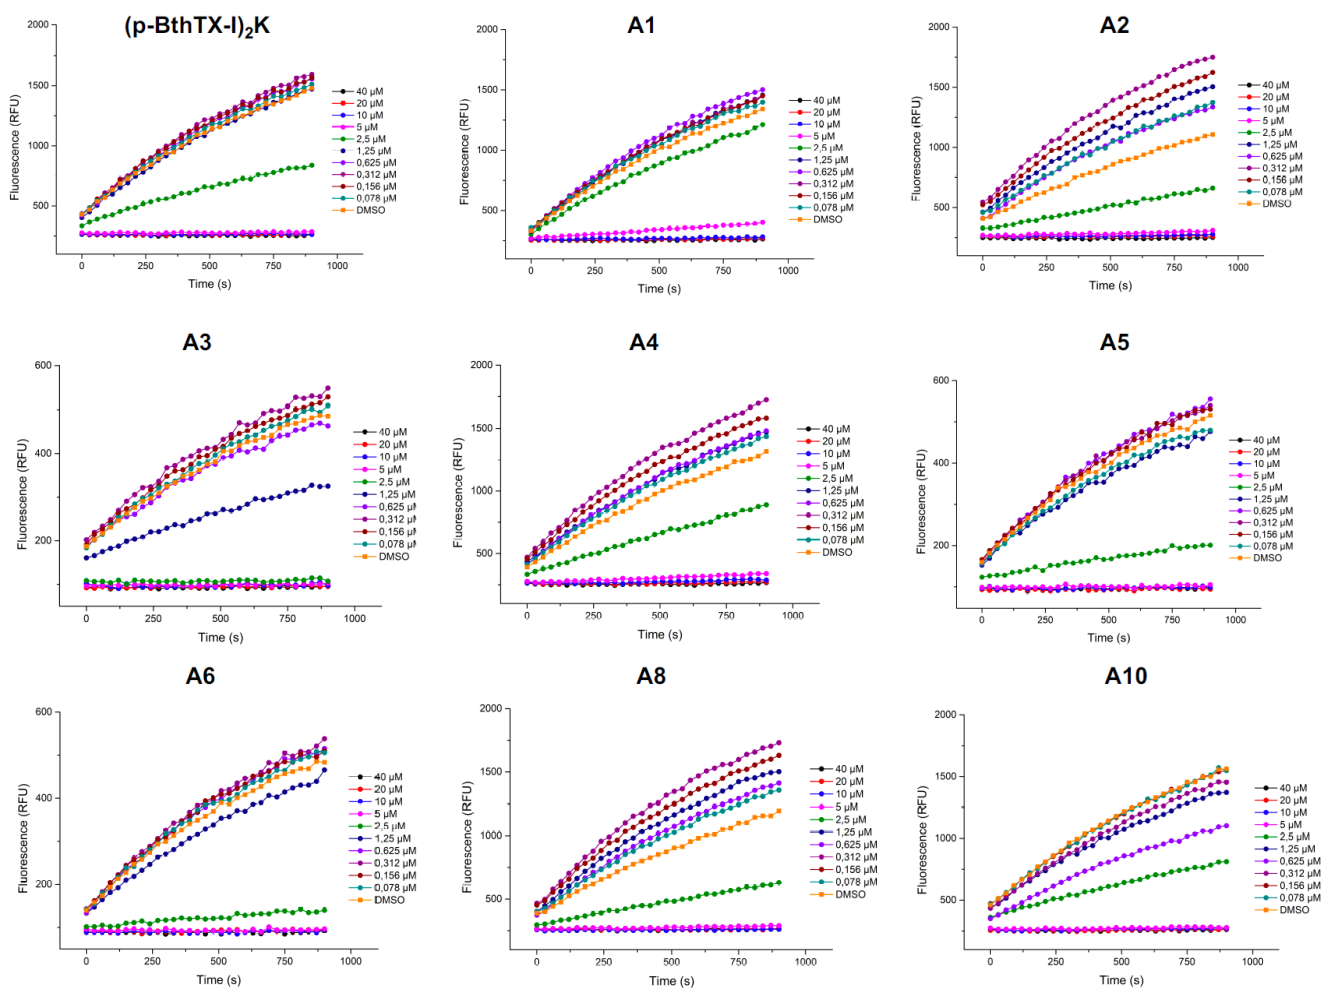

**Figure S8.** Representative time-dependent traces of the substrate fluorescence at different inhibitor concentrations.

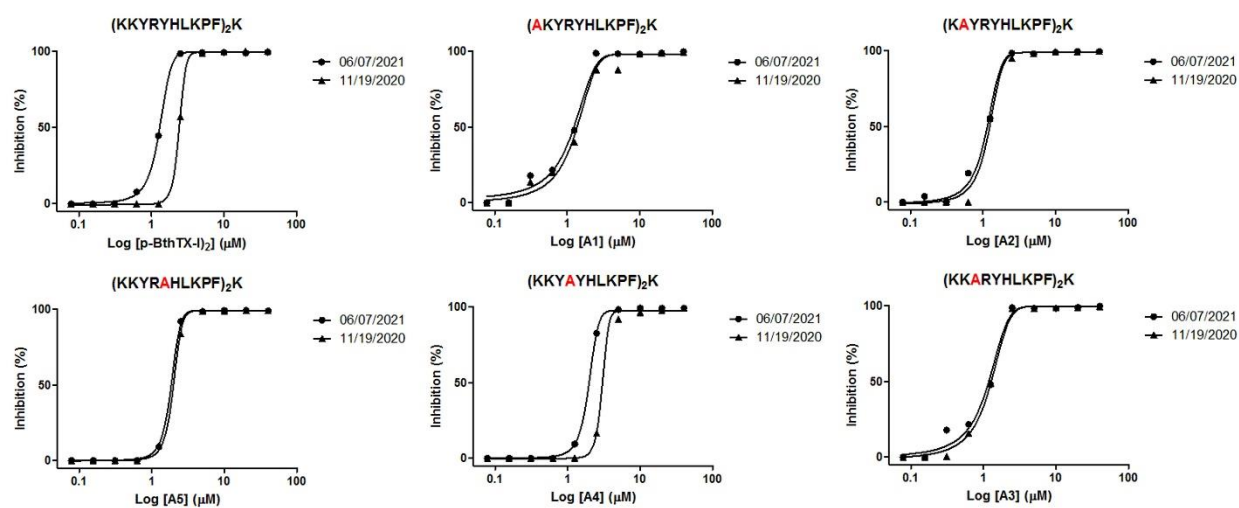

**Figure S9.** IC<sub>50</sub> plots of representative peptides collected in November/2020 and June/2021.

**Table S1:** Inhibitory activity of (pBthTX-I)<sub>2</sub>K and analogs against SARS-CoV-2 and PL<sup>Pro</sup> at 100  $\mu$ M and 10  $\mu$ M, respectively. The substituted Ala residue on the sequence of each peptide is indicated as red.

| Code                      | Peptide Sequence                   | M.W.<br>(Da) | SARS-CoV-2                     | PL <sup>Pro</sup>             |
|---------------------------|------------------------------------|--------------|--------------------------------|-------------------------------|
|                           |                                    |              | % of inhibition at 100 $\mu$ M | % of inhibition at 10 $\mu$ M |
| (pBthTX-I) <sub>2</sub> K | (KKYRYHLKPF) <sub>2</sub> K        | 2868         | 27                             | 98 $\pm$ 2                    |
| A1                        | (AKYRYHLKPF) <sub>2</sub> K        | 2754         | 4                              | 97 $\pm$ 1                    |
| A2                        | (KAKYRYHLKPF) <sub>2</sub> K       | 2754         | 10                             | 99 $\pm$ 1                    |
| A3                        | (KKARYHLKPF) <sub>2</sub> K        | 2684         | 57                             | 95 $\pm$ 1                    |
| A4                        | (KKYAYHLKPF) <sub>2</sub> K        | 2698         | 10                             | 97 $\pm$ 1                    |
| A5                        | (KKYRAHLKPF) <sub>2</sub> K        | 2684         | 70                             | 95 $\pm$ 1                    |
| A6                        | (KKYRYALKPF) <sub>2</sub> K        | 2736         | 22                             | 97 $\pm$ 1                    |
| A8                        | (KKYRYHLAPF) <sub>2</sub> K        | 2754         | 29                             | 99 $\pm$ 1                    |
| A10                       | (KKYRYHLKPA) <sub>2</sub> K        | 2716         | 7                              | 98 $\pm$ 1                    |
| A11                       | (KKYRYHLKPF) <sub>4</sub> (K)2K    | 5848         | 54                             | 98 $\pm$ 1                    |
| A12                       | (KKYRYHLKPF) <sub>2</sub> K(d-aa)  | 2868         | 69                             | 96 $\pm$ 1                    |
| Hy-a1                     | IFGAILPLALGALKNLIK-NH <sub>2</sub> | 1865         | 59                             | 13 $\pm$ 3                    |

n.d. = not determined
